# Supplementary material for: The effect of catheter-based sham renal denervation in hypertension: systematic review and meta-analysis
Source: PubMed Central journal article supplement (PMC10182607; doi:10.1186/s12872-023-03269-w), 2023-05-12

# **Supplementary Material**

## **Table of Contents**

|                                                                                                                                           |    |
|-------------------------------------------------------------------------------------------------------------------------------------------|----|
| Supplementary Table 1 – Search strategies .....                                                                                           | 2  |
| Supplementary Table 2. Blinding Index of patients in included trials.....                                                                 | 3  |
| Supplementary Table 3. Metaregression according to age, male (%), diabetic patients (%), .....<br>number of anti-hypertensive drugs ..... | 4  |
| Supplementary Figure 1. Jackknife leave-one-out sensitivity analysis .....                                                                | 5  |
| Supplementary Figure 2. Subgroup analysis according to risk of bias.....                                                                  | 7  |
| Supplementary Figure 3. Subgroup analysis by generation of procedure.....                                                                 | 9  |
| Supplementary Figure 4. Funnel plot for primary outcomes.....                                                                             | 11 |

**Supplementary Table 1 – Search strategies**

| <b>#</b>  | <b><u>Searches</u></b>          |
|-----------|---------------------------------|
| <b>1</b>  | (renal adj2 denervation).af.    |
| <b>2</b>  | randomized controlled trial.pt. |
| <b>3</b>  | controlled clinical trial.pt.   |
| <b>4</b>  | randomized.ab.                  |
| <b>5</b>  | sham.ab.                        |
| <b>6</b>  | randomly.ab.                    |
| <b>7</b>  | trial.ab.                       |
| <b>8</b>  | exp animals/ not humans.sh.     |
| <b>9</b>  | 2 or 3 or 4 or 5 or 6 or 7      |
| <b>10</b> | 9 not 8                         |
| <b>11</b> | 1 and 10                        |
| <b>12</b> | sham.af.                        |
| <b>13</b> | sham*.af.                       |
| <b>14</b> | sham-control*.af.               |
| <b>15</b> | 12 or 13 or 14                  |
| <b>16</b> | 11 and 15                       |
| <b>17</b> | remove duplicates from 16       |

**Supplementary Table 2. Blinding Index of patients in included trials**

|                               |                   | SYMPPLICITY HTN-3 | Desch et al. | ReSet | RADIANCE-HTN SOLO                          | SPYRAL HTN-OFF MED Pivotal | SPYRAL HTN-ON MED | REDUCE HTN: REINFORCE | RE |
|-------------------------------|-------------------|-------------------|--------------|-------|--------------------------------------------|----------------------------|-------------------|-----------------------|----|
| <b>James Blinding Index *</b> | Discharge         | 0,68 [0,64; 0,72] | -            | 0,83  | 0,7 [0,62; 0,77]                           | 0,66 [0,61; 0,71]          | 0,78 [0,70; 0,85] | 0,64 [0,51; 0,78]     |    |
|                               | Maximum follow-up | 0,77 [0,74; 0,81] | -            | -     | 0,6 [0,52; 0,68]                           | 0,53 (0,48; 0,59)          | 0,64 [0,54; 0,74] | 0,56 [0,42; 0,70]     |    |
| <b>Bang Blinding Index **</b> |                   |                   |              |       | <b>RSD      Sham</b>                       |                            |                   |                       |    |
|                               | Discharge         | -                 | -            | -     | 0,30 [0,16; 0,44]      -0,01 [-0,17; 0,14] | -                          | -                 | -                     |    |
|                               | Maximum follow-up | -                 | -            | -     | 0,24 [0,08; 0,41]      0,18 [0,01; 0,35]   | -                          | -                 | -                     |    |

RSD – Renal Sympathetic Denervation

\* Confidence intervals superior to and excluding 0,50 indicate effective blinding.<sup>28</sup>

\*\* Values approaching zero indicate effective blinding. Values approaching either 1 or -1 indicate incomplete blinding.<sup>29</sup>

**Supplementary Table 3. Metaregression according to age, male (%), diabetic patients (%),**

**number of anti-hypertensive drugs**

| <b>Variable</b>       | <b>Coefficient</b> | <b>Standard error</b> | <b>P&gt;z</b> | <b>[95% conf.</b> | <b>interval]</b> |
|-----------------------|--------------------|-----------------------|---------------|-------------------|------------------|
| <b>Ambulatory SBP</b> |                    |                       |               |                   |                  |
| Age                   | -.2824554          | 0.4196696             | 0.501         | -1.104993         | .5400819         |
| Male (%)              | -.0403876          | .1119416              | 0.718         | -.259789          | .1790139         |
| Diabetes (%)          | -.0729278          | .0504913              | 0.149         | -.171889          | .0260333         |
| Drugs                 | -.2166692          | .4170695              | 0.603         | -1.03411          | .6007721         |
| <b>Ambulatory DBP</b> |                    |                       |               |                   |                  |
| Age                   | -.3167957          | .1807991              | 0.080         | -.6711554         | .0375641         |
| Male (%)              | .0108073           | .0601088              | 0.857         | -.1070038         | .1286184         |
| Diabetes (%)          | -.0543901          | .0185257              | 0.003         | -.0906999         | -.0180803        |
| Drugs                 | -.3277363          | .1495818              | 0.028         | -.6209113         | -.0345613        |
| <b>Office SBP</b>     |                    |                       |               |                   |                  |
| Age                   | -1.731316          | .5721542              | 0.002         | -2.852717         | -.609914         |
| Male (%)              | .063492            | .148603               | 0.669         | -.2277646         | .3547485         |
| Diabetes (%)          | -.1598503          | .0654515              | 0.015         | -.2881328         | -.0315677        |
| Drugs                 | -1.154066          | .6512575              | 0.076         | -2.430508         | .122375          |
| <b>Office DBP</b>     |                    |                       |               |                   |                  |
| Age                   | -.7335358          | .4019761              | 0.068         | -1.521395         | .054323          |
| Male (%)              | -.0182236          | .0632087              | 0.773         | -.1421103         | .1056631         |
| Diabetes (%)          | -.0662281          | .0417557              | 0.113         | -.1480678         | .0156117         |
| Drugs                 | -.4408458          | .333437               | 0.186         | -1.09437          | .2126787         |

SBP – Systolic Blood Pressure; DBP – Diastolic Blood Pressure; Conf. interval – Confidence interval

**Supplementary Figure 1. Jackknife leave-one-out sensitivity analysis**

**(A) Change in Ambulatory Systolic Blood Pressure**

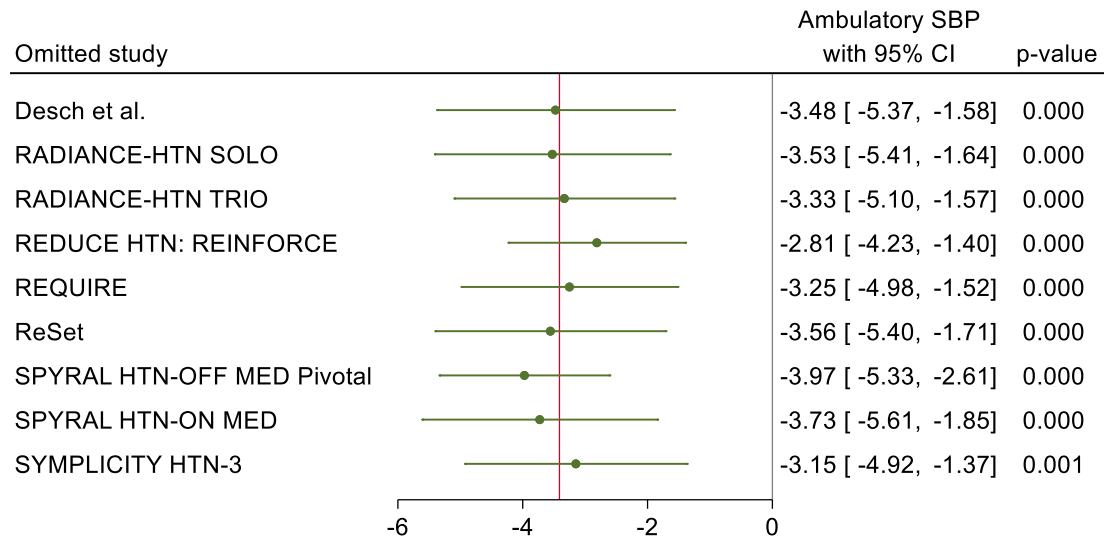

**(B) Change in Ambulatory Diastolic Blood Pressure**

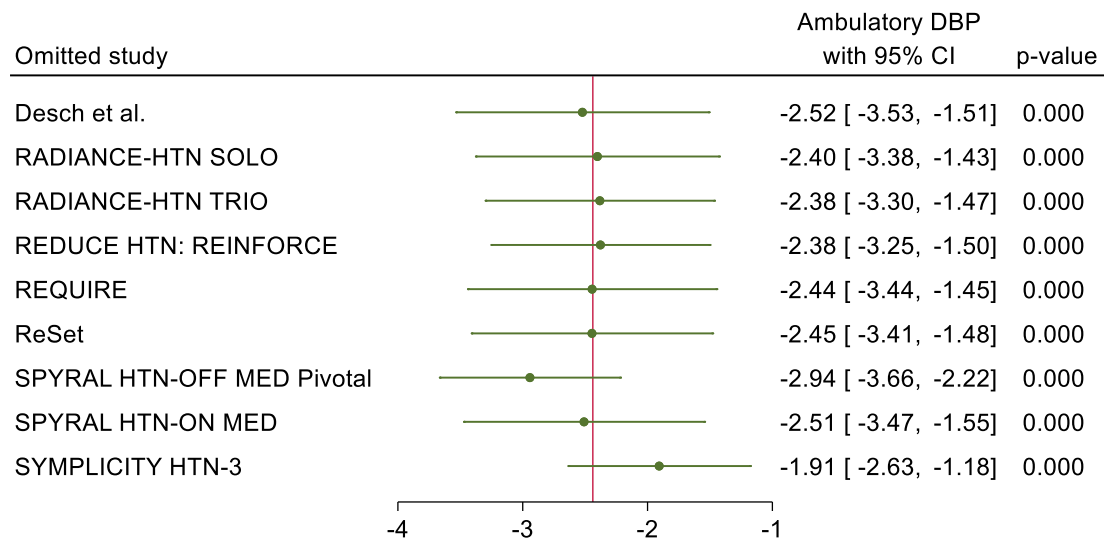

**(C) Change in Office Systolic Blood Pressure**

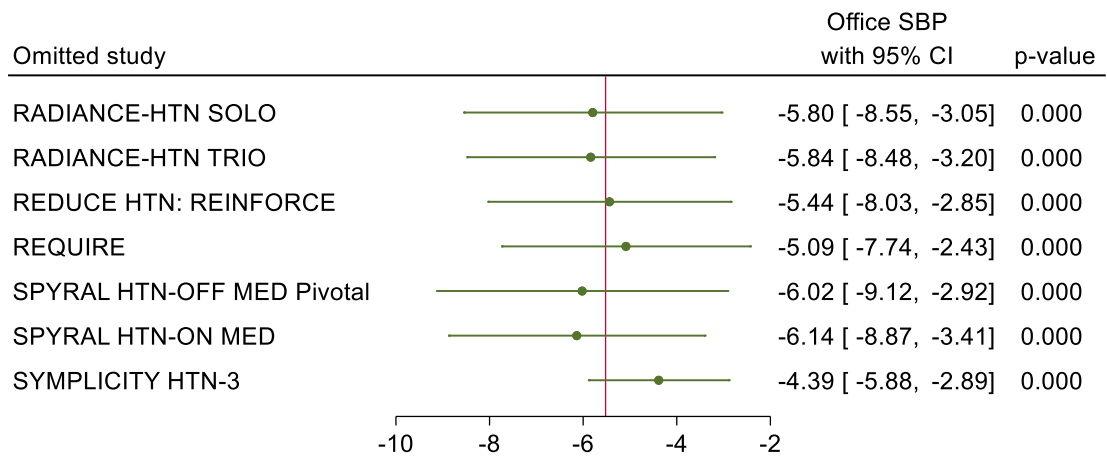

**(D) Change in Office Diastolic Blood Pressure**

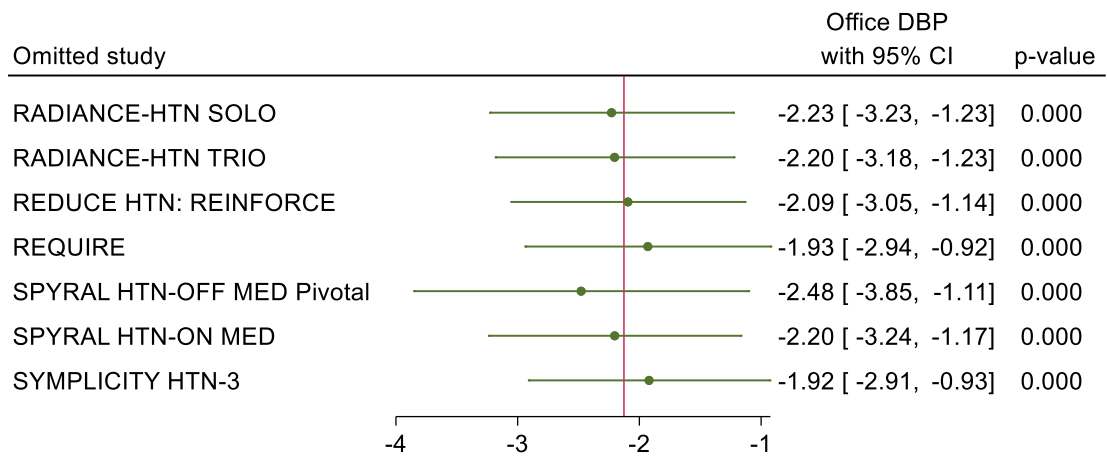

SBP – Systolic Blood Pressure; DBP – Diastolic Blood Pressure; CI – Confidence Interval

**Supplementary Figure 2. Subgroup analysis according to risk of bias.**

**(A) Change in Ambulatory Systolic Blood Pressure (SBP)**

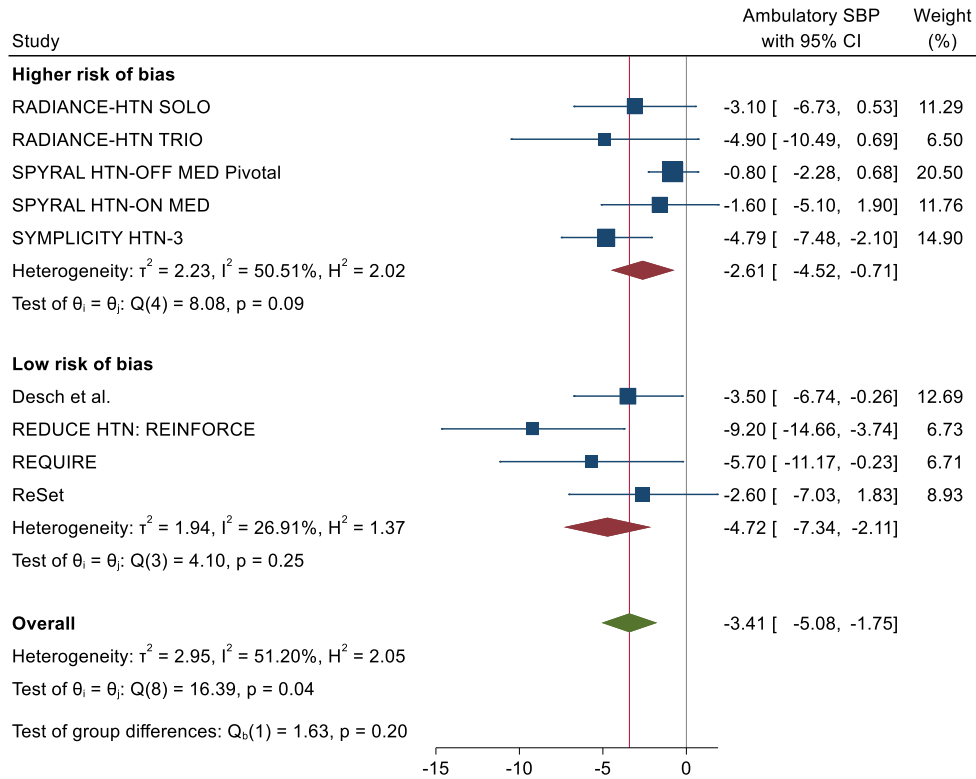

**(B) Change in Ambulatory Diastolic Blood Pressure (DBP)**

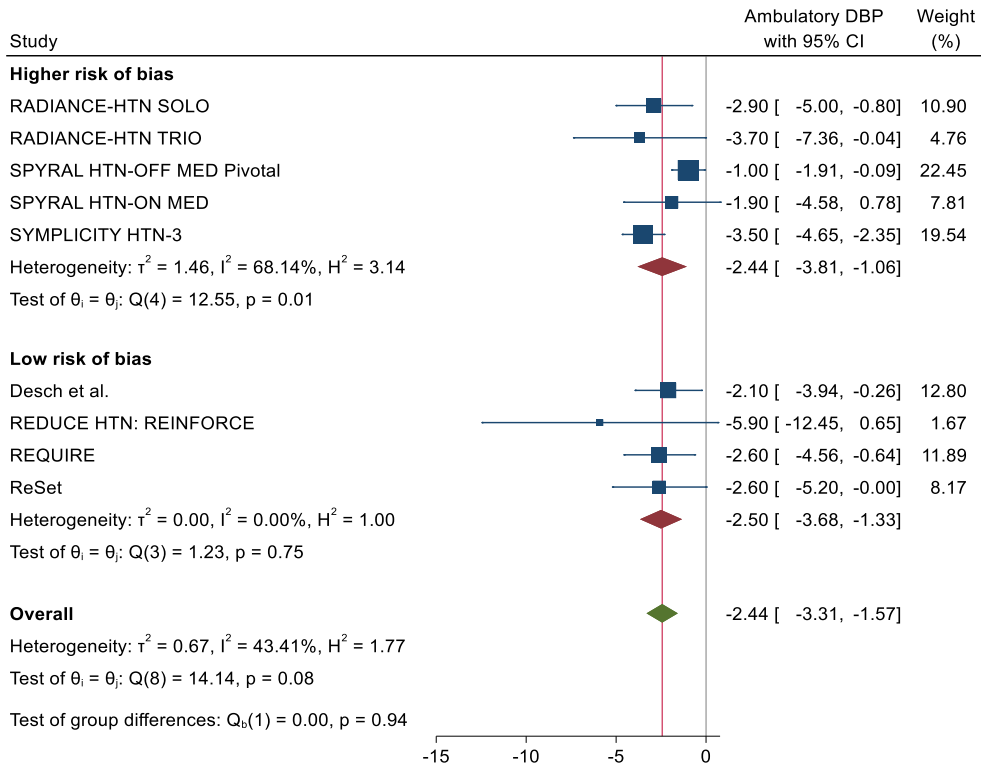

### (C) Change in Office Systolic Blood Pressure (SBP)

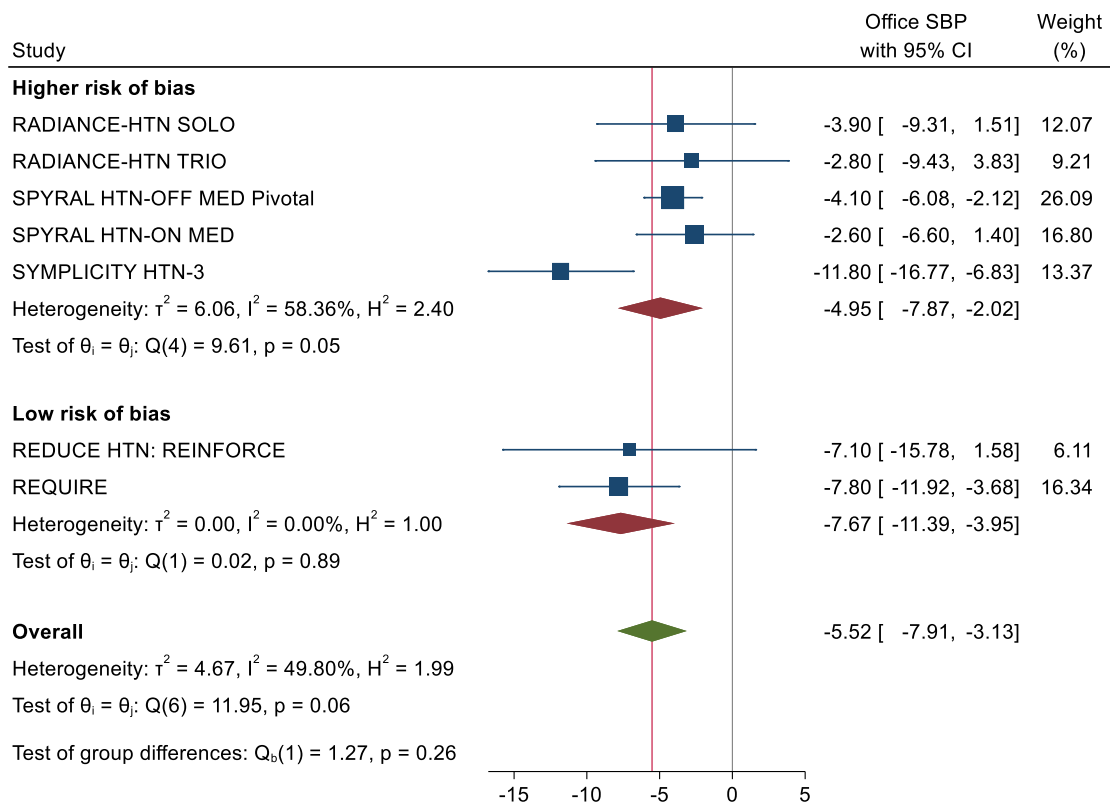

### (D) Change in Office Diastolic Blood Pressure (DBP)

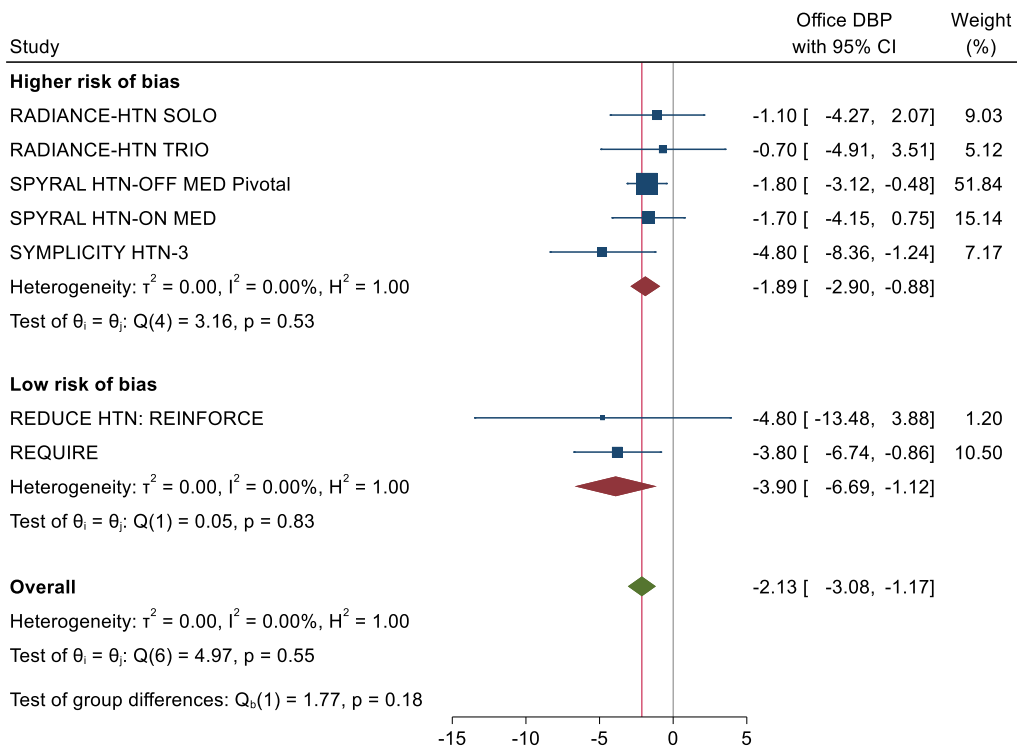

SBP – Systolic Blood Pressure; DBP – Diastolic Blood Pressure; CI – Confidence Interval



## Supplementary Figure 3. Subgroup analysis by generation of procedure

### (A) Change in Ambulatory Systolic Blood Pressure

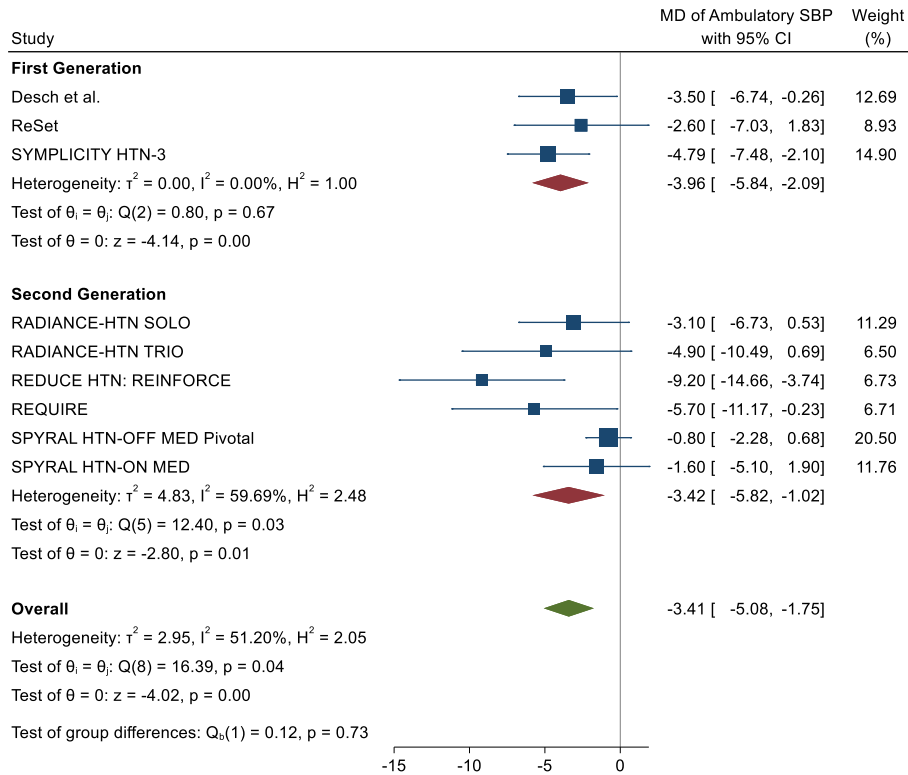

### (B) Change in Ambulatory Diastolic Blood Pressure

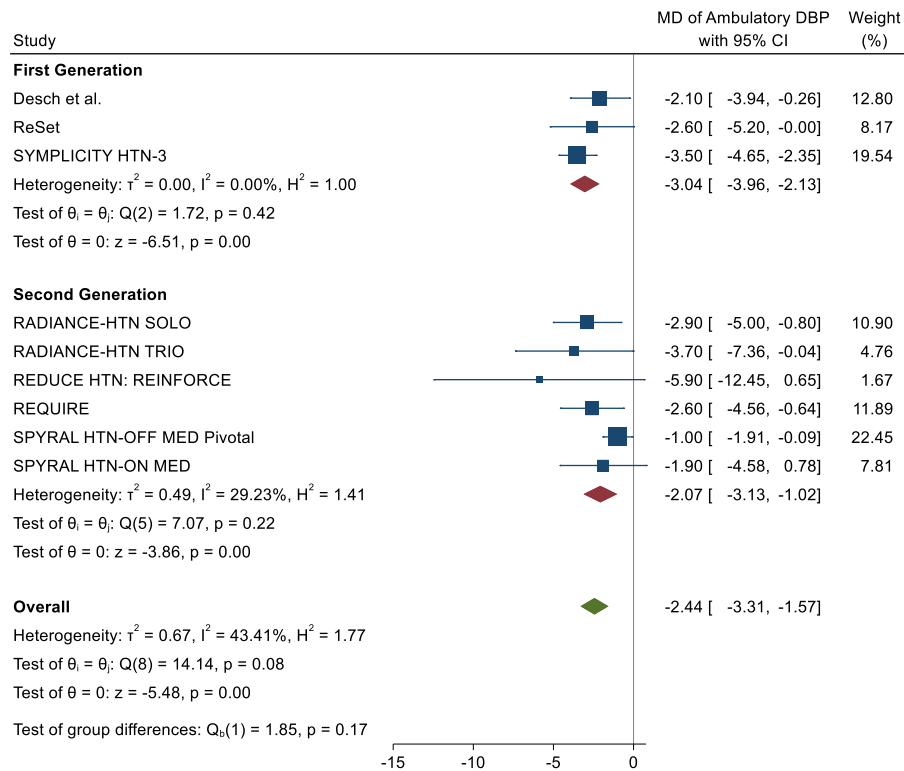

### (C) Change in Office Systolic Blood Pressure

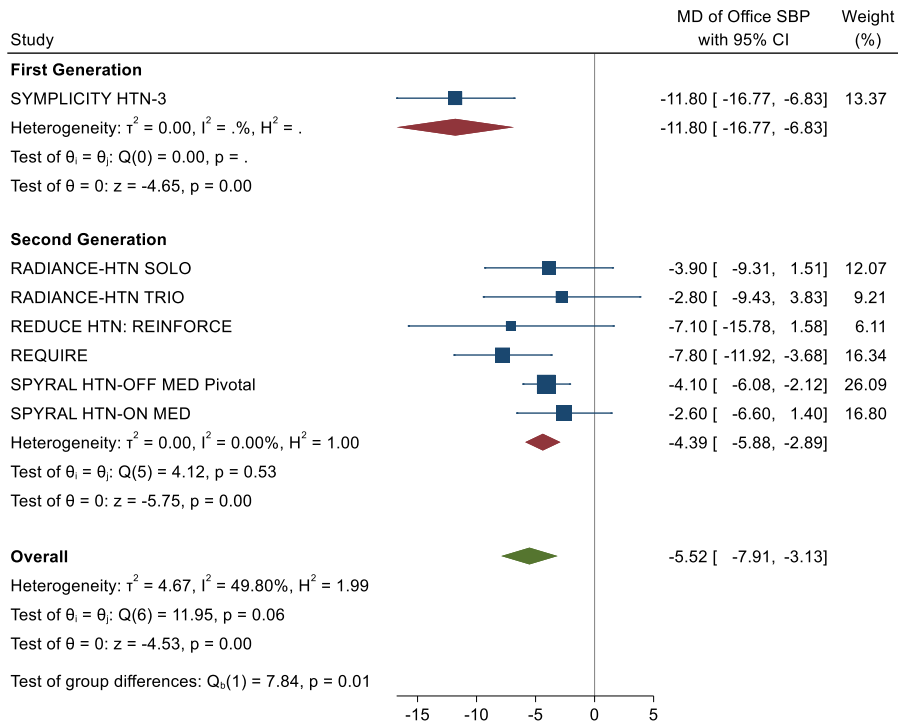

### (D) Change in Office Diastolic Blood Pressure

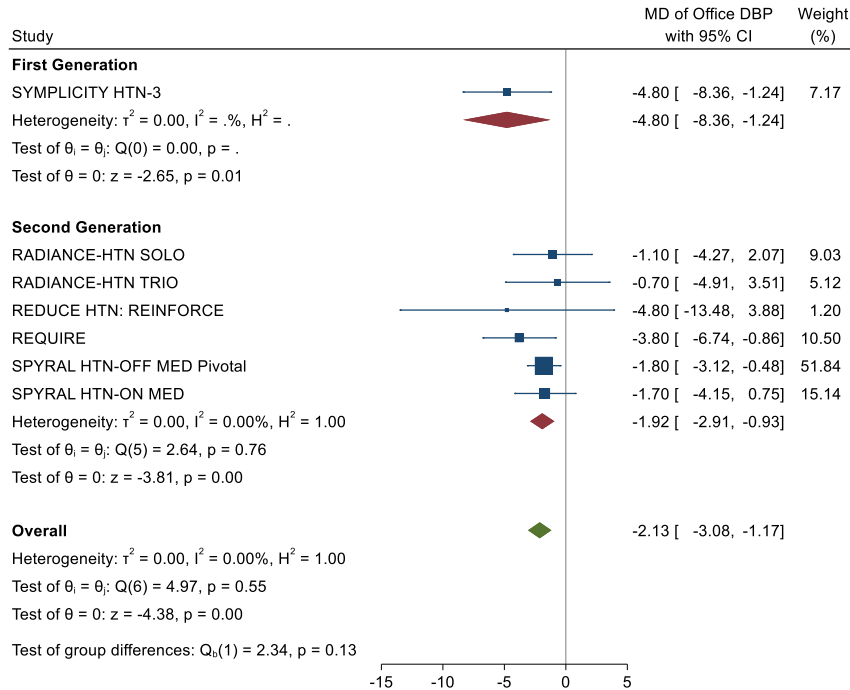

BP - Blood Pressure; RD - Renal Denervation; CI - Confidence Interval; IV - Inverse Variance;

**Supplementary Figure 4. Funnel plot for primary outcomes**

**(A) Ambulatory Systolic Blood Pressure (P = 0.0016)**

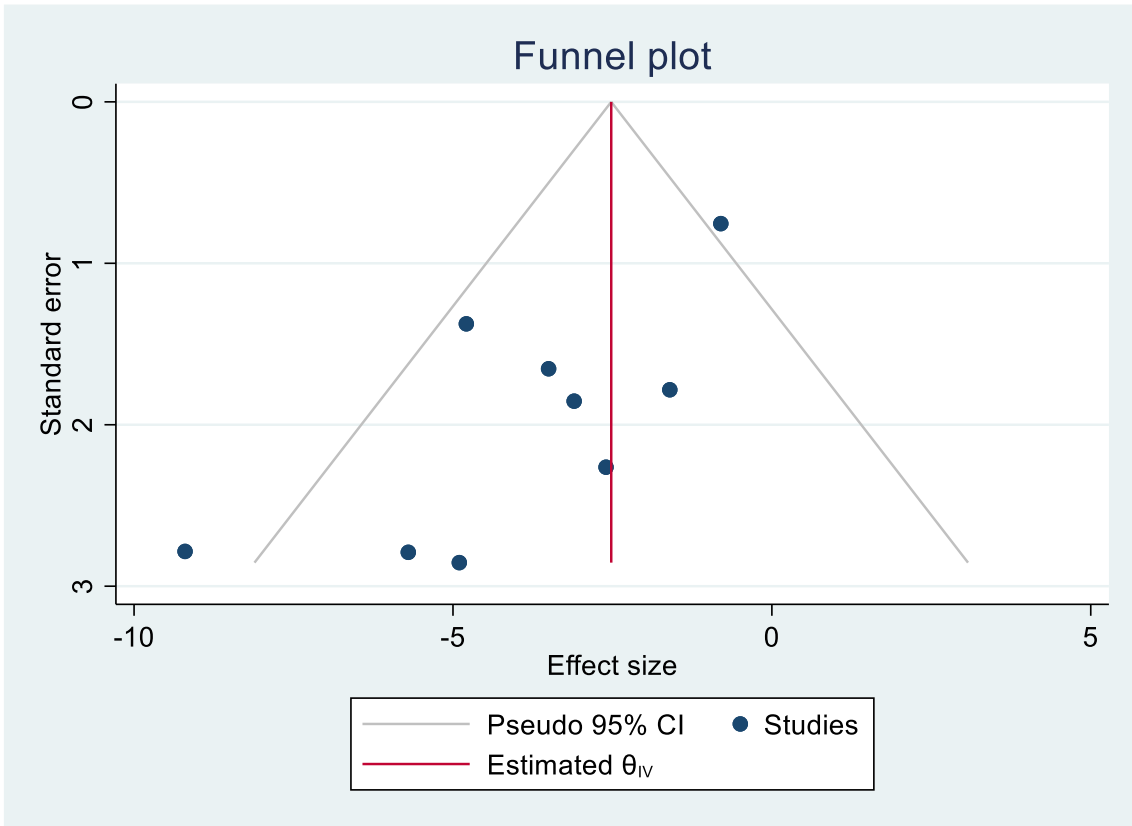

**(B) Ambulatory Diastolic Blood Pressure (P = 0.1900)**

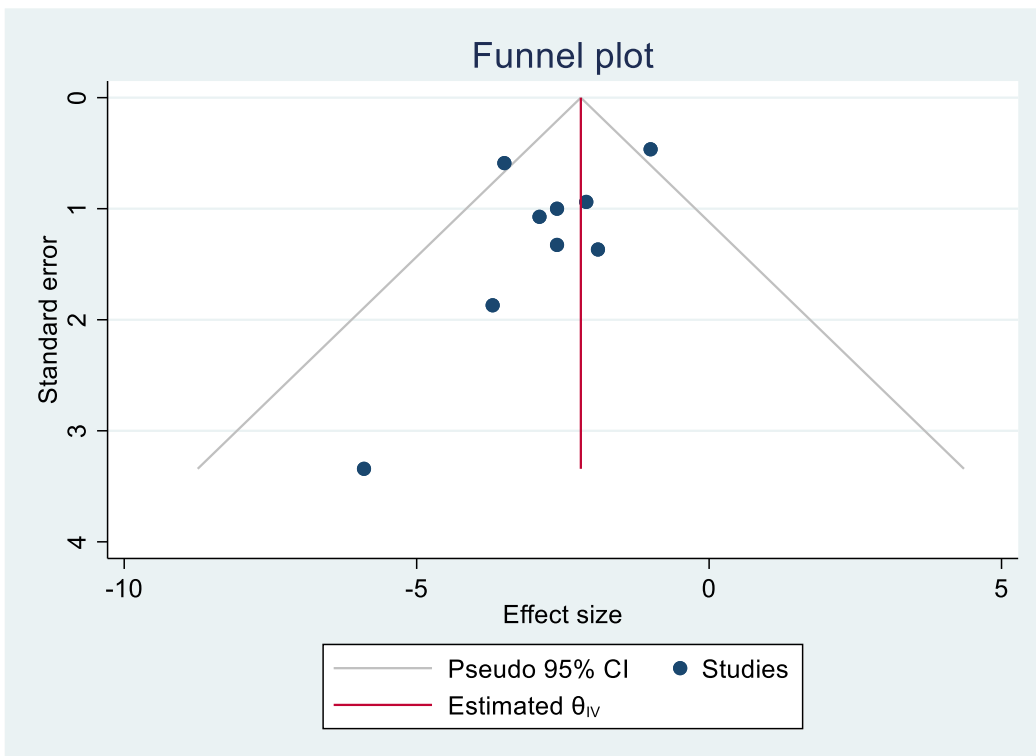

**(C) Funnel plot for Office Systolic Blood Pressure (P = 0.6677)**

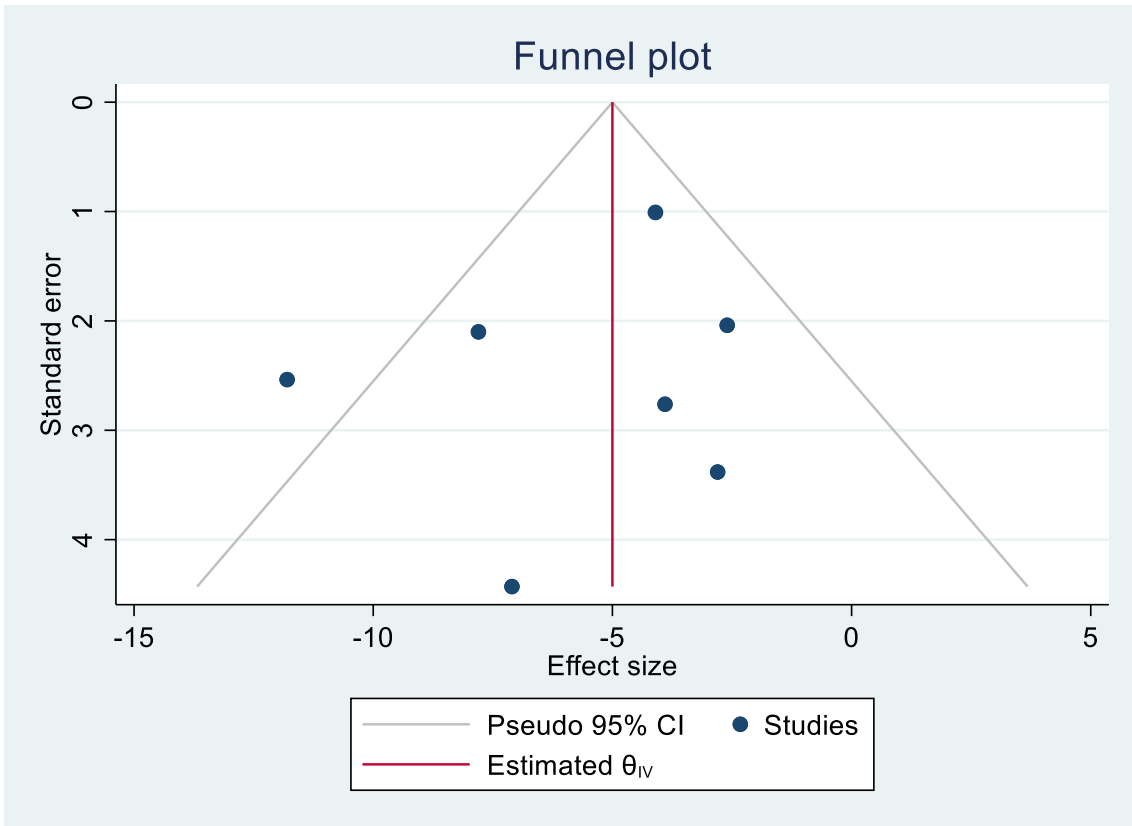

**(D) Funnel plot for Office Diastolic Blood Pressure (P = 0.3889)**

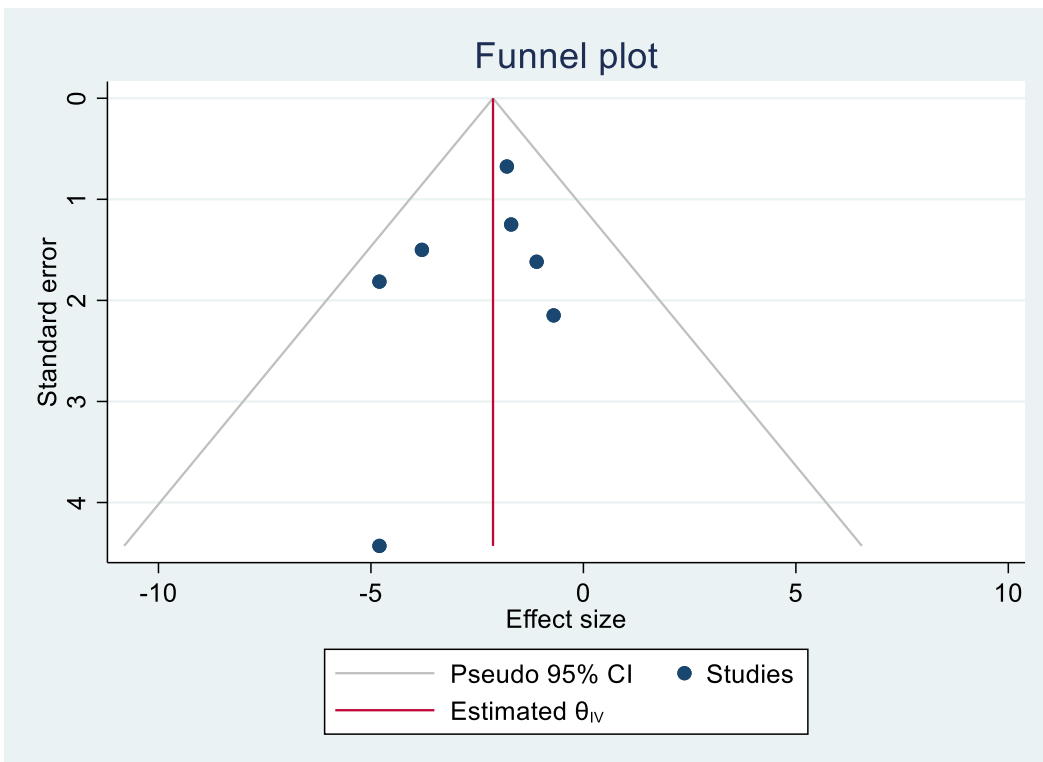

Supplement: 12872_2023_3269_MOESM1_ESM.pdf [file 12872_2023_3269_MOESM1_ESM.pdf]
